# Supplementary material for: Evaluation of the Effectiveness of Derived Features of AlphaFold2 on Single-Sequence Protein Binding Site Prediction
Source: MDPI journal article supplement (doi:10.3390/biology11101454), 2022-10-03

Table S1. The MaxASA values used in this study. The MaxASA values are measured in  $\text{\AA}^2$ .

| Residue    | MaxASA | Residue       | MaxASA |
|------------|--------|---------------|--------|
| Alanine    | 129    | Leucine       | 201    |
| Arginine   | 274    | Lysine        | 236    |
| Asparagine | 195    | Methionine    | 224    |
| Aspartate  | 193    | Phenylalanine | 240    |
| Cysteine   | 167    | Proline       | 159    |
| Glutamate  | 223    | Serine        | 155    |
| Glutamine  | 225    | Threonine     | 172    |
| Glycine    | 104    | Tryptophan    | 285    |
| Histidine  | 224    | Tyrosine      | 263    |
| Isoleucine | 197    | Valine        | 174    |

Figure S1. Visualization of 3D structure predicted by AlphaFold2 of P15309 (colored in yellow) and P15309\_V30A (colored in blue), the RMSD between these two structures is 0.050  $\text{\AA}$  (calculated by PYMOL). The mutation site is colored in red (pointed by an arrow).

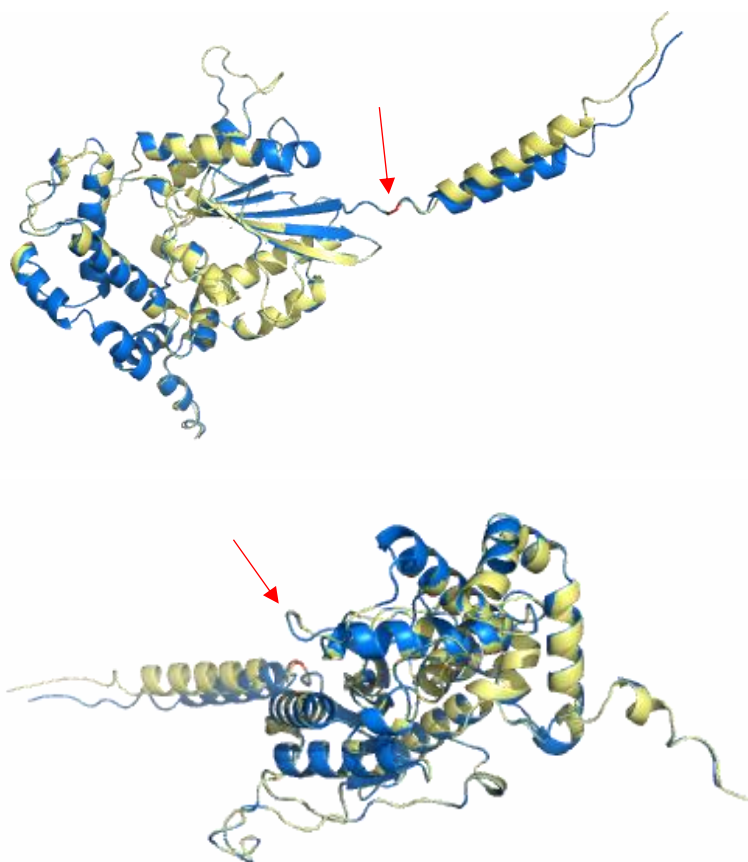

Figure S2. Visualization of 3D structure predicted by AlphaFold2 of O06071 (colored in yellow) and O06071\_I30A (colored in blue), the RMSD between these two

structures is 0.441 Å (calculated by PYMOL). The mutation site is colored in red (pointed by an arrow).

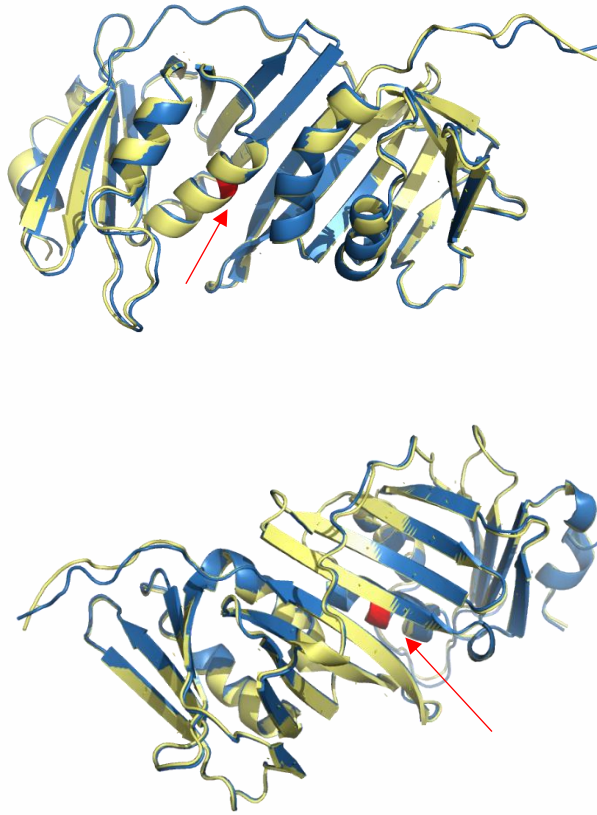

Figure S3. Visualization of 3D structure predicted by AlphaFold2 of Q9UIL1 (colored in yellow) and Q9UIL1\_R30A (colored in blue), the RMSD between these two structures is 2.264 Å (calculated by PYMOL). The mutation site is colored in red (pointed by an arrow).

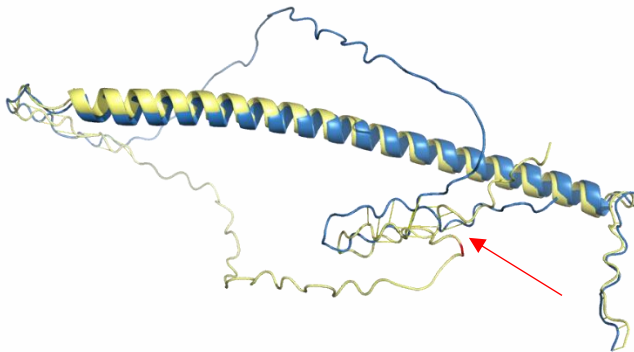

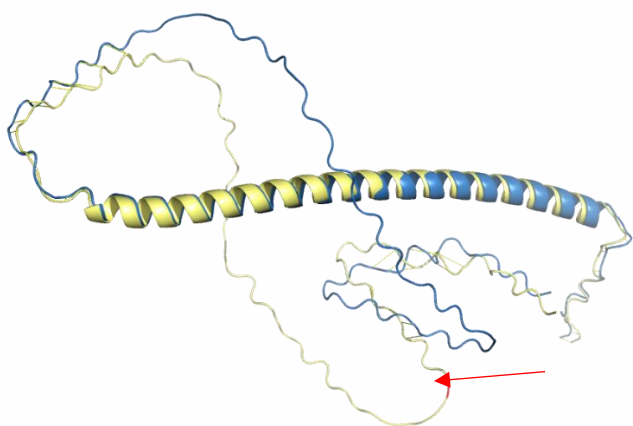

Supplement: s1 [file s1]
